# Supplementary material for: Perceptions of healthcare professionals about the adoption and use of EHR in Gulf Cooperation Council countries: a systematic review
Source: PubMed Central journal article supplement — BMJ Health Care Inform. 2020 Jan 9;27(1):e100099. doi: 10.1136/bmjhci-2019-100099 (PMC7062356; doi:10.1136/bmjhci-2019-100099), 2020-01-09
Supplement: bmjhci-2019-100099supp001.pdf [file bmjhci-2019-100099supp001.pdf]

**Online supplementary table 1: An example of the complete search strategy using PubMed database (title/abstract)**

| <b>Used OR</b>                                                                                                                                                                                                                                                                                                 | <b>Open search</b> | <b>Limited to 2006 – 2017/English/Arabic</b> | <b>Used AND</b> |
|----------------------------------------------------------------------------------------------------------------------------------------------------------------------------------------------------------------------------------------------------------------------------------------------------------------|--------------------|----------------------------------------------|-----------------|
| Perception<br>Attitude<br>Perspective<br>Beliefs                                                                                                                                                                                                                                                               | 72,629             | 41,226                                       |                 |
| Electronic health record<br>EHR<br>Electronic medical record<br>EMR<br>Electronic record<br>Digital record<br>Digital medical record<br>Digital health record<br>Digitised record<br>Digitized record<br>Electronic health information system<br>Health information system<br>HIS<br>Ehealth<br>Digital health | 459,445            | 242,944                                      | 1,884           |
| GCC<br>Gulf cooperation council<br>Gulf Countries<br>Bahrain<br>Kuwait<br>Oman<br>Qatar<br>Saudi Arabia<br>United Arab Emirates<br>UAE<br>Middle East                                                                                                                                                          | 263,762            | 154,859                                      | 95              |
